# Supplementary material for: Evaluation of enamel integrity after clear aligner attachments removal: a risk–benefit comparison of one-step tools
Source: PeerJ journal article supplement (doi:10.7717/peerj.20200), 2025-10-15
Supplement: Supplementary_Data.zip [file Supplementary Data.xlsx]

## Sheet: Data
Tooth number	Group	Attachment removal time (s)	Enamel loss (mm)		Ra_T0(µm)		Ra_T1(µm)
			Examiner1	Examiner2	Examiner1	Examiner2	Examiner1	Examiner2
1	1	60	0.02	0.02	0.695444	0.686889	0.469333	0.469333
2	1	55	0.009	0.008	0.470444	0.459556	0.386444	0.388389
3	1	42	0.008	0.008	0.646444	0.653889	0.481889	0.480778
4	1	40	0.008	0.009	0.406333	0.412833	0.585111	0.584389
5	1	45	0.005	0.005	0.819889	0.821111	0.785667	0.8005
6	1	40	0.014	0.013	0.766111	0.770056	0.624556	0.617111
7	1	43	0.009	0.009	0.696556	0.692611	0.383667	0.382833
8	1	41	0.012	0.014	0.418444	0.415556	0.503556	0.503611
9	1	51	0.015	0.015	0.398556	0.402278	0.575556	0.565278
10	1	42	0.007	0.006	0.491111	0.492222	0.638556	0.636444
11	2	45	0.023	0.023	0.598333	0.592	0.557222	0.564611
12	2	36	0.027	0.026	0.718222	0.730778	0.754778	0.754222
13	2	56	0.02	0.021	1.07133	1.07017	0.353333	0.354833
14	2	53	0.01	0.01	0.511556	0.529778	0.441889	0.434944
15	2	38	0.015	0.013	0.787889	0.786111	0.424778	0.433389
16	2	35	0.007	0.007	0.795889	0.802111	0.456778	0.464722
17	2	38	0.014	0.013	0.734889	0.730611	0.733111	0.727889
18	2	54	0.008	0.007	0.814111	0.816389	0.580111	0.591556
19	2	45	0.013	0.014	0.849333	0.8575	0.722778	0.726222
20	2	47	0.027	0.024	0.420111	0.423222	0.412222	0.406444
21	3	48	0.006	0.006	0.688556	0.690278	0.423556	0.423278
22	3	43	0.027	0.026	0.499	0.504667	0.678222	0.681611
23	3	44	0.026	0.026	0.373889	0.371944	0.673667	0.6725
24	3	43	0.008	0.007	0.918111	0.911222	0.441333	0.439
25	3	46	0.024	0.025	0.854222	0.833111	0.510444	0.507056
26	3	50	0.007	0.007	0.493333	0.495	0.411556	0.410444
27	3	57	0.008	0.006	0.423111	0.428222	0.568667	0.567
28	3	50	0.025	0.028	0.476111	0.484722	0.407111	0.406556
29	3	55	0.019	0.019	0.469333	0.467667	0.873667	0.873667
30	3	60	0.038	0.018	0.537889	0.532778	0.633778	0.633722
31	4	64	0.02	0.019	0.757111	0.753722	0.666889	0.658944
32	4	75	0.012	0.012	0.706889	0.718278	0.495111	0.492556
33	4	54	0.014	0.013	0.408333	0.412333	0.520778	0.520722
34	4	77	0.03	0.01	0.433333	0.434167	0.370222	0.369611
35	4	65	0.015	0.014	0.529778	0.526889	0.652111	0.673722
36	4	70	0.022	0.022	0.590889	0.576444	0.411	0.412667
37	4	67	0.012	0.012	0.500222	0.491611	0.622333	0.635
38	4	70	0.04	0.01	0.696556	0.707944	0.431667	0.424833
39	4	64	0.009	0.008	0.681667	0.7005	0.409667	0.4035
40	4	55	0.009	0.007	0.421333	0.411833	0.509333	0.508167
41	5	64	0.039	0.039	0.483111	0.481389	0.556333	0.5625
42	5	62	0.04	0.05	0.599556	0.592444	0.543333	0.530333
43	5	70	0.04	0.04	0.456667	0.452667	0.702333	0.675
44	5	68	0.031	0.041	0.414444	0.419556	0.376222	0.375611
45	5	74	0.036	0.036	0.434556	0.426278	0.575556	0.580611
46	5	55	0.027	0.026	0.399333	0.390667	0.479667	0.488167
47	5	58	0.071	0.081	0.427667	0.446833	0.556	0.528
48	5	65	0.047	0.049	0.484222	0.481944	0.604111	0.612056
49	5	65	0.025	0.035	0.493333	0.481333	0.730889	0.730278
50	5	58	0.038	0.048	0.563	0.559	0.639556	0.616111
51	6	103	0.037	0.036	0.622333	0.612667	0.455667	0.457333
52	6	75	0.01	0.02	0.557333	0.5665	0.452222	0.452278
53	6	73	0.049	0.039	0.450111	0.442889	0.403667	0.405667
54	6	85	0.037	0.017	0.597222	0.600111	0.605222	0.600611
55	6	97	0.025	0.015	0.881	0.874833	0.662333	0.66
56	6	73	0.05	0.02	0.701111	0.699889	0.621222	0.613778
57	6	83	6	0.009	1.13511	1.12256	0.745667	0.748
58	6	75	0.029	0.019	0.637222	0.621778	0.825667	0.824
59	6	85	0.033	0.013	0.469333	0.469333	0.711333	0.701667
60	6	95	0.043	0.023	0.350444	0.357556	0.654333	0.6475
61	7	40	0.139	0.129	0.726333	0.7315	0.746778	0.750222
62	7	50	0.092	0.092	0.492111	0.496056	0.859778	0.858056
63	7	55	0.07	0.08	0.487667	0.4905	0.711444	0.708556
64	7	53	0.137	0.136	0.633889	0.637278	0.848889	0.844111
65	7	60	0.099	0.099	1.06222	1.04511	1.07344	1.09172
66	7	62	0.213	0.223	0.534444	0.537889	0.786778	0.795889
67	7	52	0.077	0.077	0.596111	0.601222	0.824444	0.825056
68	7	62	0.188	0.187	0.413889	0.412444	0.672111	0.680389
69	7	56	0.046	0.045	0.399667	0.402	0.526444	0.535556
70	7	50	0.084	0.084	0.487556	0.480111	1.06322	1.05244

## Sheet: Note
Group
1	OneGloss
2	Enhance
3	SM 104
4	Sof-Lex disc
5	Tungsten carbide bur
6	Zirconia bur
7	White stone bur
